# Supplementary material for: A dual-sensitized luminescent europium(iii) complex as a photoluminescent probe for selectively detecting Fe3+
Source: Royal Society of Chemistry journal article supplement (doi:10.1039/d0ra03821k), 2020-01-01
Supplement: d0ra03821k1.pdf [file d0ra03821k1.pdf]

## Supporting Information

### **A dual-sensitized luminescent Europium(III) complex as photoluminescent probe for selectively detecting Fe<sup>3+</sup>**

Yafeng Zhao,<sup>a#</sup> Yanhong Xu,<sup>a#</sup> Bing Xu,<sup>c</sup> Peipei Cen,<sup>b\*</sup> Weiming Song,<sup>a\*</sup> Lijuan Duan<sup>a</sup> and Xiangyu Liu<sup>a,d\*</sup>

<sup>a</sup> College of agriculture, College of Chemistry and Chemical Engineering, Ningxia University, Yinchuan 750021, China.

<sup>b</sup> College of Public Health and Management, Ningxia Medical University, Yinchuan 750021, China

<sup>c</sup> School of Chemistry and Chemical Engineering, Xi'an University of Architecture & Technology, Xi'an 710055, China

<sup>d</sup> State Key Laboratory of Coordination Chemistry, Nanjing University, Nanjing, 210023, China

# These authors contributed equally to this work.

**\*Corresponding author**

**Dr. Xiangyu Liu**

**Tel.: +86-951-2062004**

**Fax: +86-951-2062860**

**E-mail: xiangyuliu432@126.com**

**\*Corresponding author**

**Prof. Weiming Song**

**E-mail: songwm@nxu.edu.cn**

**\*Corresponding author**

**Dr. Peipei Cen**

**E-mail: 13895400691@163.com**

## **Contents**

**Fig. S1** Molecular stacking charts of **1**.

**Fig. S2** PXRD patterns of **1**.

**Fig. S3** TG curve for **1**.

**Fig. S4** PXRD patterns of **1** after being soaked in water.

**Fig. S5** NMR spectrum of **1** after dissolving in MeOH.

**Table S1.** Selected bond lengths (Å) and bond angles (°) for **1**.

**Table S2.** The calculated results for Eu<sup>III</sup> ions configuration of **1** by SHAPE 2.1 software.

**Table S3.** Comparison of detection capacity of **1** towards Fe<sup>3+</sup> ion with other materials.

## **References**

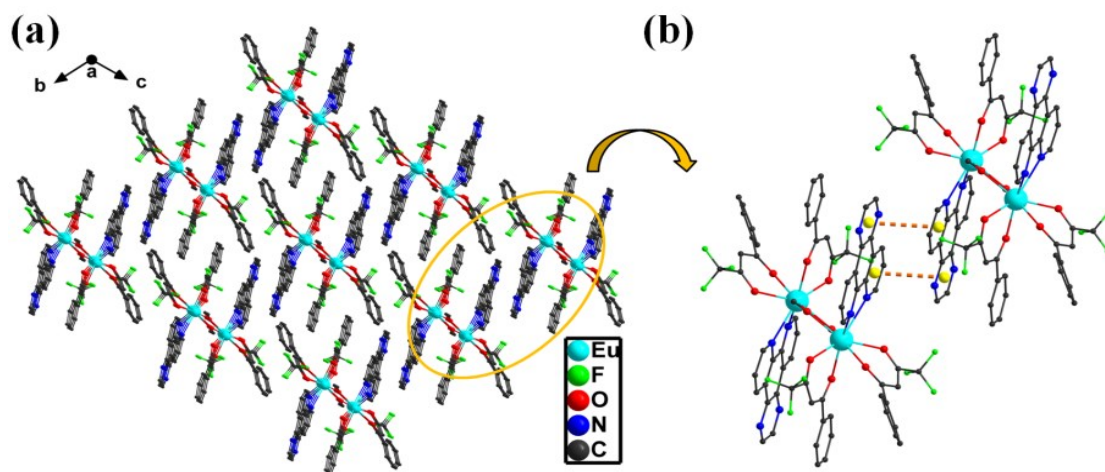

Fig. S1 Molecular stacking charts of 1.

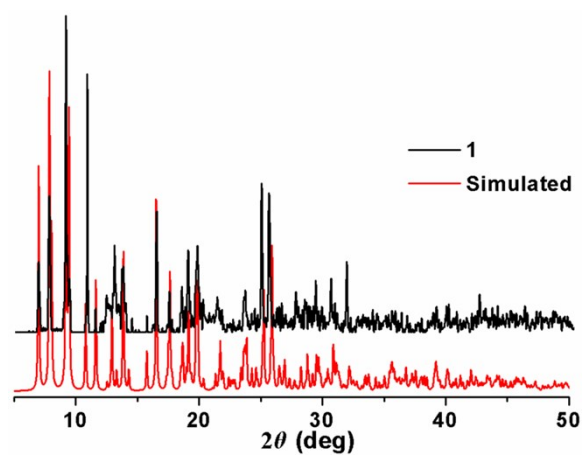

Fig. S2 PXRD patterns of 1.

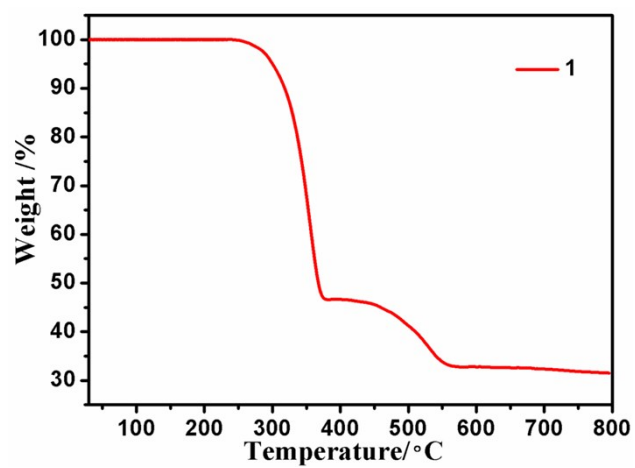

Fig. S3 TG curve for 1.

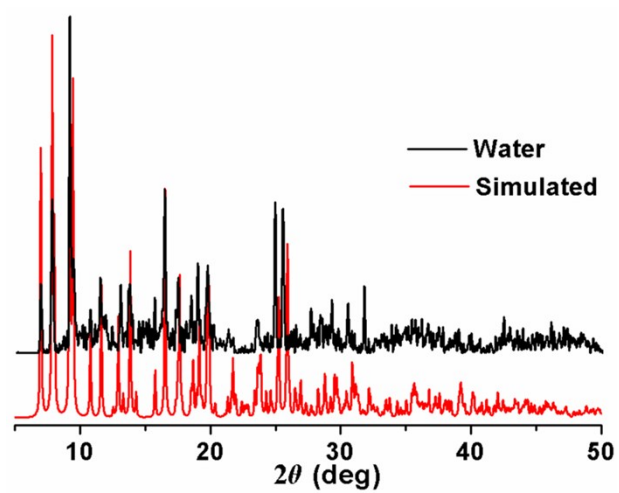

Fig. S4 PXR D patterns of **1** after being soaked in water.

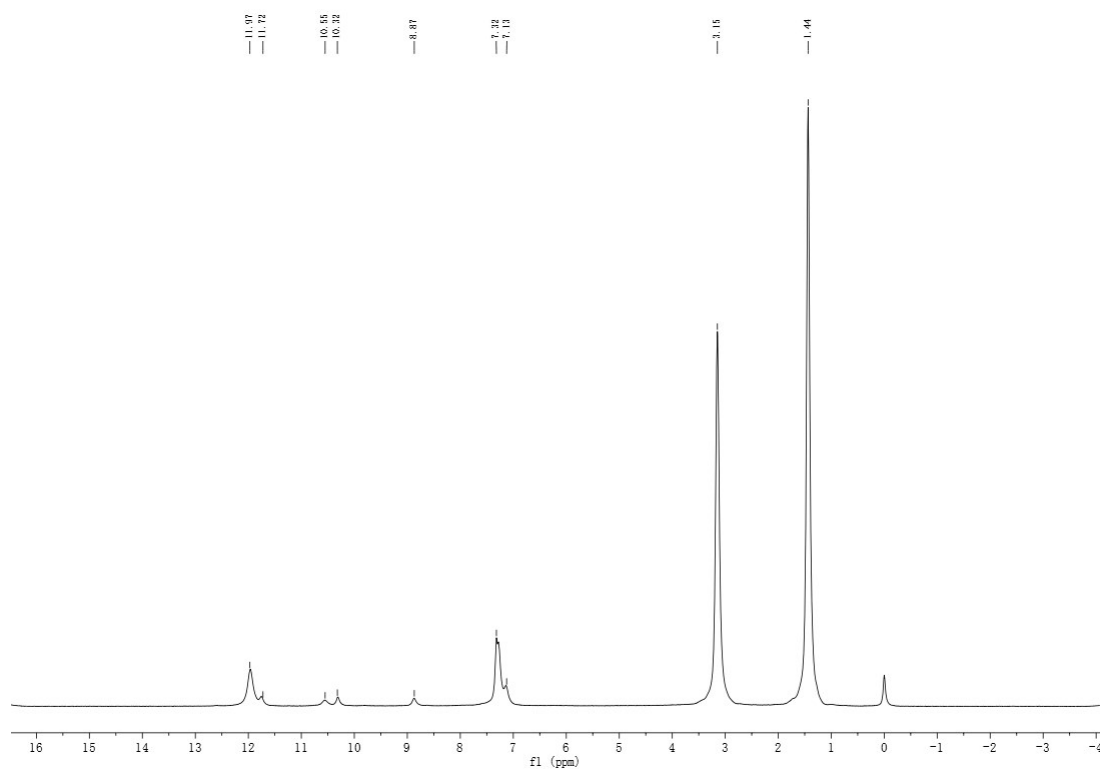

Fig. S5 NMR spectrum of **1** after dissolving in MeOH.

**Table S1.** Selected bond lengths (Å) and bond angles (°) for **1**.

| Compound <b>1</b>   |            |                    |            |
|---------------------|------------|--------------------|------------|
| Eu(1)-O(1)          | 2.385(5)   | Eu(1)-O(2)         | 2.373(5)   |
| Eu(1)-O(3)          | 2.393(5)   | Eu(1)-O(4)         | 2.437(5)   |
| Eu(1)-O(5)          | 2.312(5)   | Eu (1)-O(5)#1      | 2.313(4)   |
| Eu(1)-N(1)          | 2.624(6)   | Eu(1)-N(2)         | 2.609(6)   |
| O(1)-Eu(1)-O(3)     | 137.29(17) | O(1)-Eu(1)-O(4)    | 71.98(16)  |
| O(1)-Eu(1)-N(1)     | 82.05(16)  | O(1)-Eu(1)-N(2)    | 140.49(18) |
| O(2)-Eu(1)-O(3)     | 72.27(17)  | O(2)-Eu(1)-O(3)    | 80.94(16)  |
| O(2)-Eu(1)-O(4)     | 79.92(17)  | O(2)-Eu(1)-N(1)    | 147.41(18) |
| O(2)-Eu(1)-N(2)     | 147.08(18) | O(3)-Eu(1)-O(4)    | 71.00(16)  |
| O(3)-Eu(1)-N(1)     | 106.56(16) | O(3)-Eu(1)-N(2)    | 73.24(18)  |
| O(4)-Eu(1)-N(1)     | 73.17(18)  | O(4)-Eu(1)-N(2)    | 109.57(17) |
| O(5)-Eu(1)-O(1)     | 78.38(16)  | O(5) #1-Eu(1)-O(1) | 121.73(15) |
| O(5)-Eu(1)-O(2)     | 115.03(16) | O(5) #1-Eu(1)-O(2) | 77.82(17)  |
| O(5)-Eu(1)-O(3)     | 144.10(17) | O(5) #1-Eu(1)-O(3) | 82.63(16)  |
| O(5)-Eu(1)-O(4)     | 140.70(16) | O(5) #1-Eu(1)-O(4) | 147.74(18) |
| O(5) -Eu(1)-O(5) #1 | 70.80(19)  | O(5)-Eu(1)-N(1)    | 77.74(16)  |
| O(5) #1-Eu(1)-N(1)  | 133.99(18) | O(5)-Eu(1)-N(2)    | 78.18(17)  |
| O(5) #1-Eu(1)-N(2)  | 78.91(17)  | N(2)-Eu(1)-N(1)    | 62.14(17)  |

#1 1-X,1-Y,1-Z

**Table S2.** The calculated results for Eu<sup>III</sup> ions configuration of **1** by SHAPE 2.1 software.Eu<sup>III</sup> ion geometry analysis of **1**.

|                  |                                                         |                                            |        |        |         |          |         |        |        |        |                  |
|------------------|---------------------------------------------------------|--------------------------------------------|--------|--------|---------|----------|---------|--------|--------|--------|------------------|
| HEPPT-8          | 3 D6h                                                   | Hexagonal bipyramid                        |        |        |         |          |         |        |        |        |                  |
| CU-8             | 4 Oh                                                    | Cube                                       |        |        |         |          |         |        |        |        |                  |
| SAPR-8           | 5 D4d                                                   | Square antiprism                           |        |        |         |          |         |        |        |        |                  |
| TDD-8            | 6 D2d                                                   | Triangular dodecahedron                    |        |        |         |          |         |        |        |        |                  |
| JGBF-8           | 7 D2d                                                   | Johnson gyrobifastigium J26                |        |        |         |          |         |        |        |        |                  |
| JETBPT-8         | 8 D3h                                                   | Johnson elongated triangular bipyramid J14 |        |        |         |          |         |        |        |        |                  |
| JBTFR-8          | 9 C2v                                                   | Biaugmented trigonal prism J50             |        |        |         |          |         |        |        |        |                  |
| BTFR-8           | 10 C2v                                                  | Biaugmented trigonal prism                 |        |        |         |          |         |        |        |        |                  |
| JSD-8            | 11 D2d                                                  | Snub diphenoid J84                         |        |        |         |          |         |        |        |        |                  |
| TT-8             | 12 Td                                                   | Triakis tetrahedron                        |        |        |         |          |         |        |        |        |                  |
| ETBPT-8          | 13 D3h                                                  | Elongated trigonal bipyramid               |        |        |         |          |         |        |        |        |                  |
| Structure [ML8 ] | HEPPT-8                                                 | CU-8                                       | SAPR-8 | TDD-8  | JGBF-8  | JETBPT-8 | JBTFR-8 | BTFR-8 | JSD-8  | TT-8   | ETBPT-8          |
| ABOXIY           | 15.765,                                                 | 9.160,                                     | 0.626, | 2.420, | 16.045, | 28.065,  | 2.983,  | 2.489, | 5.294, | 9.881, | 23.701           |
|                  | Configuration                                           |                                            |        |        |         |          |         |        |        |        | ABOXIY, <b>1</b> |
|                  | Hexagonal bipyramid ( $D_{6h}$ )                        |                                            |        |        |         |          |         |        |        |        | 15.765           |
|                  | Cube ( $O_h$ )                                          |                                            |        |        |         |          |         |        |        |        | 9.160            |
|                  | Square antiprism ( $D_{4d}$ )                           |                                            |        |        |         |          |         |        |        |        | <b>0.626</b>     |
|                  | Triangular dodecahedron ( $D_{2d}$ )                    |                                            |        |        |         |          |         |        |        |        | 2.420            |
|                  | Johnson gyrobifastigium J26 ( $D_{2d}$ )                |                                            |        |        |         |          |         |        |        |        | 16.045           |
|                  | Johnson elongated triangular bipyramid J14 ( $D_{3h}$ ) |                                            |        |        |         |          |         |        |        |        | 28.065           |
|                  | Biaugmented trigonal prism J50 ( $C_{2v}$ )             |                                            |        |        |         |          |         |        |        |        | 2.983            |
|                  | Biaugmented trigonal prism ( $C_{2v}$ )                 |                                            |        |        |         |          |         |        |        |        | 2.489            |
|                  | Snub siphenoid J84 ( $D_{2d}$ )                         |                                            |        |        |         |          |         |        |        |        | 5.294            |
|                  | Triakis tetrahedron( $T_d$ )                            |                                            |        |        |         |          |         |        |        |        | 9.881            |
|                  | Elongated trigonal bipyramid( $D_{3h}$ )                |                                            |        |        |         |          |         |        |        |        | 23.701           |

**Table S3.** Comparison of detection capacity of **1** towards Fe<sup>3+</sup> ion with other materials.

| Materials                                                                                                                 | Solvent | Detection Limit           | Ref.      |
|---------------------------------------------------------------------------------------------------------------------------|---------|---------------------------|-----------|
| [Tb(tftba) <sub>1.5</sub> (phen)(H <sub>2</sub> O)] <sub>n</sub>                                                          | Water   | 1.27 × 10 <sup>-5</sup> M | 1         |
| Eu-MOF                                                                                                                    | Water   | 1.5 × 10 <sup>-5</sup> M  | 2         |
| [Tb(HL)(H <sub>2</sub> O) <sub>2</sub> (NO <sub>3</sub> )]·NO <sub>3</sub>                                                | Water   | 1.6 × 10 <sup>-5</sup> M  | 3         |
| [Tb(HL) <sub>1.5</sub> (H <sub>2</sub> O)(DMF)]·2H <sub>2</sub> O                                                         | aqueous | 2.0 × 10 <sup>-5</sup> M  | 4         |
| [Eu <sub>2</sub> (BTFA) <sub>4</sub> (OMe) <sub>2</sub> (dpq) <sub>2</sub> ]                                              | Water   | 3.5 × 10 <sup>-5</sup> M  | This work |
| Eu <sup>3+</sup> @MIL-53-COOH (Al)                                                                                        | Water   | 5.0 × 10 <sup>-5</sup> M  | 5         |
| BUT-15                                                                                                                    | Water   | 8.0 × 10 <sup>-5</sup> M  | 6         |
| [Eu(bpda) <sub>1.5</sub> ]·H <sub>2</sub> O <sub>n</sub>                                                                  | Water   | 9.0 × 10 <sup>-5</sup> M  | 7         |
| {[Cd <sub>3</sub> (HL) <sub>2</sub> (H <sub>2</sub> O) <sub>3</sub> ]·3H <sub>2</sub> O·2CH <sub>3</sub> CN} <sub>n</sub> | Water   | 9.06 × 10 <sup>-5</sup> M | 8         |
| [Zn <sub>5</sub> (hfipbb) <sub>4</sub> (trz) <sub>2</sub> (H <sub>2</sub> O) <sub>2</sub> ] <sub>n</sub>                  | Water   | 2.0 × 10 <sup>-4</sup> M  | 9         |
| {[Cd(5-asba)(bimbu)]} <sub>n</sub>                                                                                        | Water   | 1.87 × 10 <sup>-4</sup> M | 10        |
| EuL <sub>3</sub>                                                                                                          | Ethanol | 10 <sup>-4</sup> M        | 11        |
| Eu(acac) <sub>3</sub> ·Zn(C <sub>15</sub> H <sub>12</sub> NO <sub>2</sub> ) <sub>2</sub>                                  | DMF     | 5.0 × 10 <sup>-3</sup> M  | 12        |

**References:**

- (1) H.-H. Yu, J.-Q. Chi, Z.-M. Su, X. Li, J. Sun, C. Zhou and Q. Liu, *CrystEngComm.*, 2020, 3638-3643.
- (2) W. Yang, J. Li, Z. Xu, J. Yang, Y. Liu and L. Liu, *J. Mater. Chem. C.*, 2019, **7**, 10297-10308.
- (3) W. Gao, F. Liu, B.-Y. Zhang, X.-M. Zhang, J.-P. Liu, E.-Q. Gao and Q.-Y. Gao, *Dalton Trans.*, 2017, **46**, 13878-13887.
- (4) F. Zhao, X.-Y. Guo, Z.-P. Dong, Z.-L. Liu and Y.-Q. Wang, *Dalton Trans.*, 2020, **47**, 8972-8982.
- (5) Y. Zhou, H.-H. Chen and B. Yan, *J. Mater. Chem. A.*, 2014, **2**, 13691-13697.
- (6) H.-J. Zhang, R.-Q. Fan, W. Chen, J.-Z. Fan, Y. W.-Dong, Y. Song, X.-Du, P. Wang and Y. L. Yang, *Cryst. Growth Des.*, 2016, **16**, 5429-5440.
- (7) J. Wang, J.-R. Wang, Y. Li, M. Jiang, L.-W. Zhang and P.-Y. Wu, *New J. Chem.*, 2016, **40**,

8600-8606.

(8) W. Q. Tong, W.-N. Liu, J. G. Cheng, P.-F. Zhang, G.-P. Li, L. Hou and Y.-Y. Wang, *Dalton Trans.*, 2018, **47**, 9466-9473.

(9) B.-L. Hou, D. Tian, J. Liu, L.-Z. Dong, S.-L. Li, D.-S. Li and Y.-Q. Lan, *Inorg. Chem.*, 2016, **55**, 10580-10586.

(10) Y.-J. Yang, M.-J. Wang and K.-L. Zhang, *J. Mater. Chem. C*, 2016, **4**, 11404-11418.

(11) M. Zheng, H. Tan, Z. Xie, L. Zhang, X. Jing and Z. Sun, *ACS Appl. Mater. Interfaces.*, 2013, **5**, 1078-1083.

(12) Q. Tang, S. Liu, Y. Liu, J. Miao, S. Li, L. Zhang, Z. Shi and Z. Zheng, *Inorg. Chem.*, 2013, **52**, 2799-2801.
